# Supplementary material
Source: publisher figshare collection journal article supplement (https://future-science-group.figshare.com/ndownloader/files/31796285)
Supplement: Supplementary file 1 [file 31796285]

**Supplementary Table 5.** Post-hoc analysis of statistical power for the associations of single nucleotide polymorphisms with total cholesterol, low-density lipoprotein cholesterol, and carotid intima-media thickness change.

| Gene, SNP | Effect size | Statistical power |
| --- | --- | --- |
| Associations with total cholesterol change | | |
| *LPA* rs10455872 | 0.222 | 0.70 |
| *LDLR* rs11672123 | 0.395 | 0.99 |
| *LDLR* rs6511720 | 0.641 | 0.99 |
| *APOC1* rs445925 | 0.250 | 0.47 |
| *APOE* rs7412 | 0.539 | 0.99 |
| *MYLIP* rs6924995 | 0.101 | 0.17 |
| *MYLIP* rs3757354 | 0.186 | 0.52 |
| *ABCG2* rs2199936 | 0.444 | 0.99 |
| *ABCG2* rs1481012 | 0.447 | 0.99 |
| Associations with low-density lipoprotein cholesterol change | | |
| *LPA* rs10455872 | 0.113 | 0.20 |
| *LDLR* rs11672123 | 0.306 | 0.95 |
| *LDLR* rs6511720 | 0.990 | 0.99 |
| *APOE* rs7412 | 0.990 | 0.99 |
| *APOC1* rs445925 | 0.083 | 0.08 |
| *MYLIP* rs6924995 | 0.118 | 0.22 |
| Associations with carotid intima-media thickness change | | |
| *APOC1* rs445925 | 0.950 | 0.99 |
| *MYLIP* rs6924995 | 0.500 | 0.99 |
| *LDLR* rs6511720 | 0.910 | 0.99 |
| *MYLIP* rs3757354 | 0.990 | 0.99 |
| *APOE* rs7412 | 0.750 | 0.98 |
